# Supplementary material for: Synthesis and Biological Activity of 6-Selenocaffeine: Potential Modulator of Chemotherapeutic Drugs in Breast Cancer Cells
Source: PubMed Central journal article supplement (PMC6270583; doi:10.3390/molecules18055251), 2013-05-08

## Supplementary Materials

Figure S1.  $^1\text{H}$ -NMR spectrum of 6-selenocaffeine, recorded in  $\text{DMSO-d}_6$ .

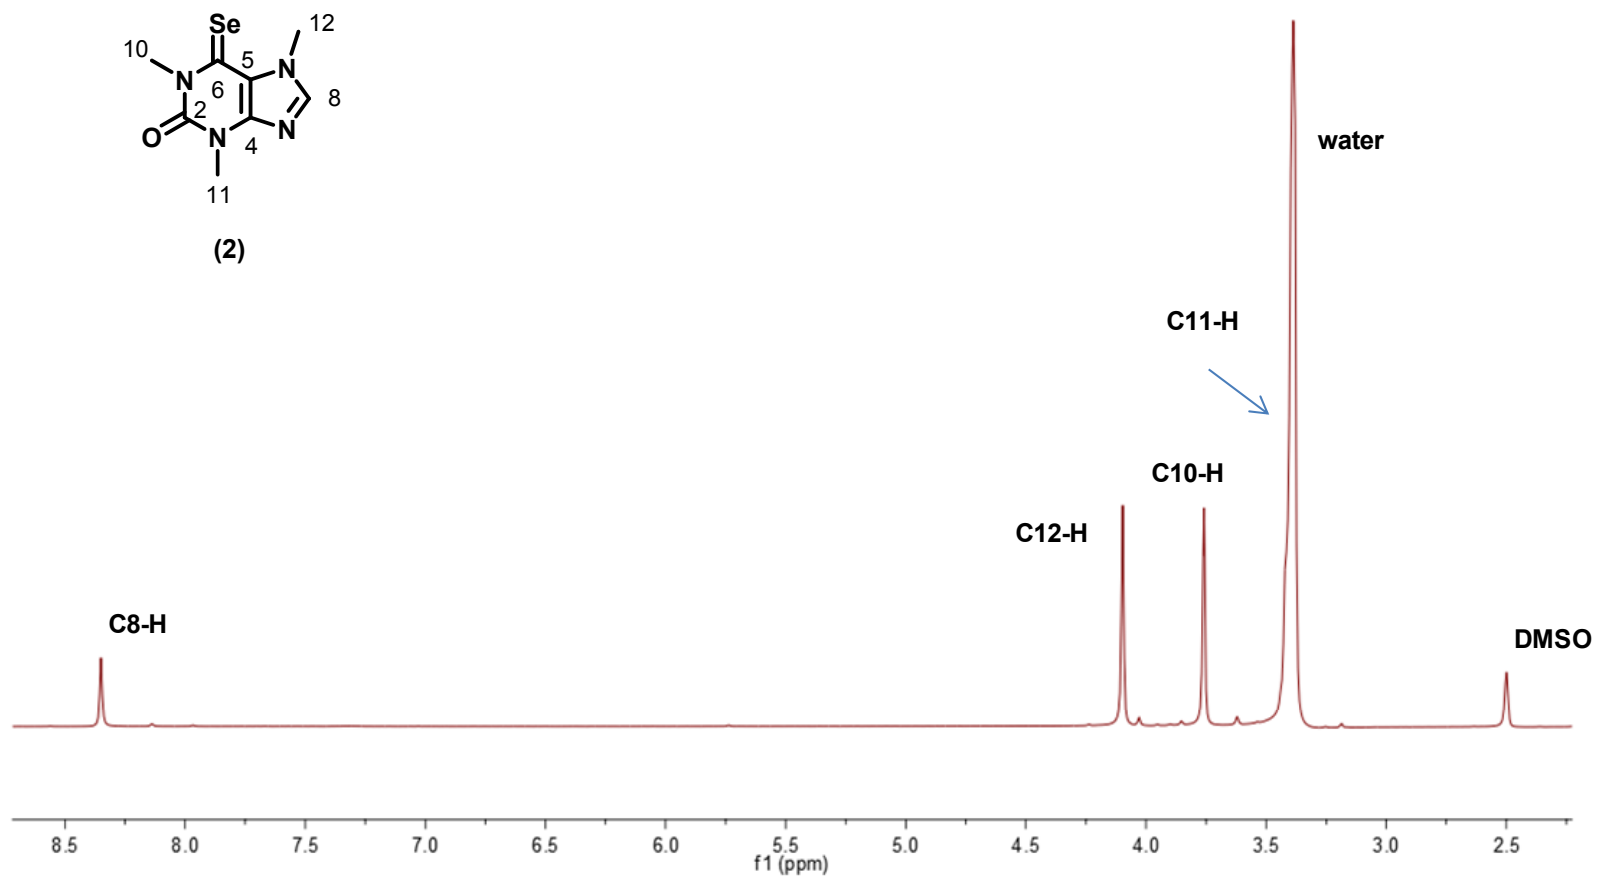

**Figure S2.**  $^{13}\text{C}$ -NMR spectrum of 6-selenocaffeine, recorded in  $\text{DMSO-d}_6$ .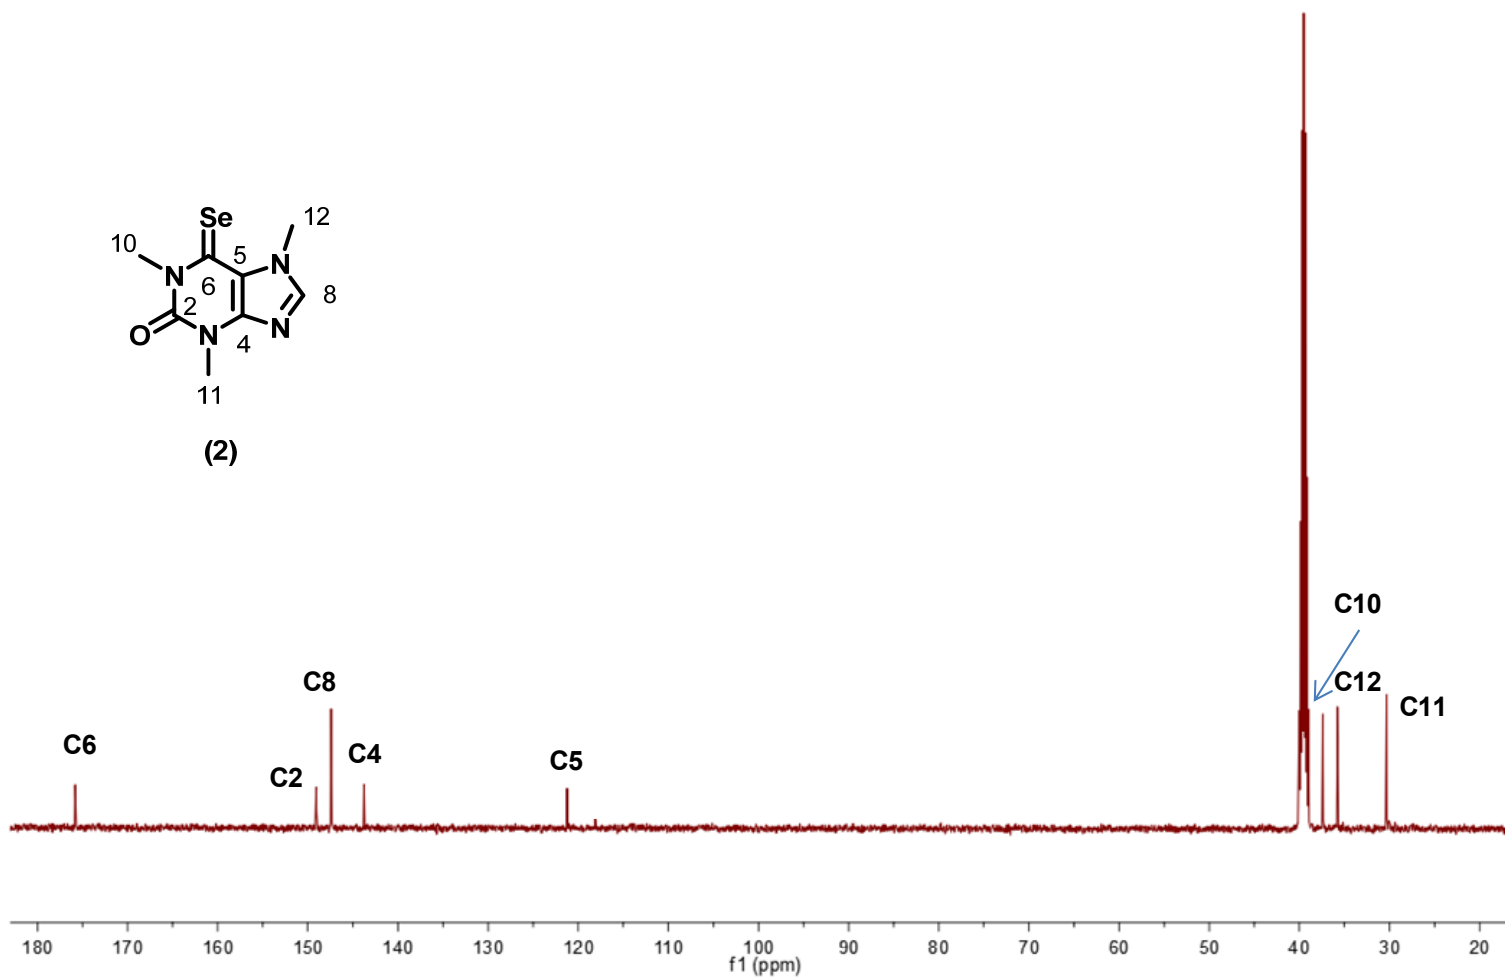

**Figure S3.** HSQC spectrum of 6-selenocaffeine, recorded in DMSO-d<sub>6</sub>.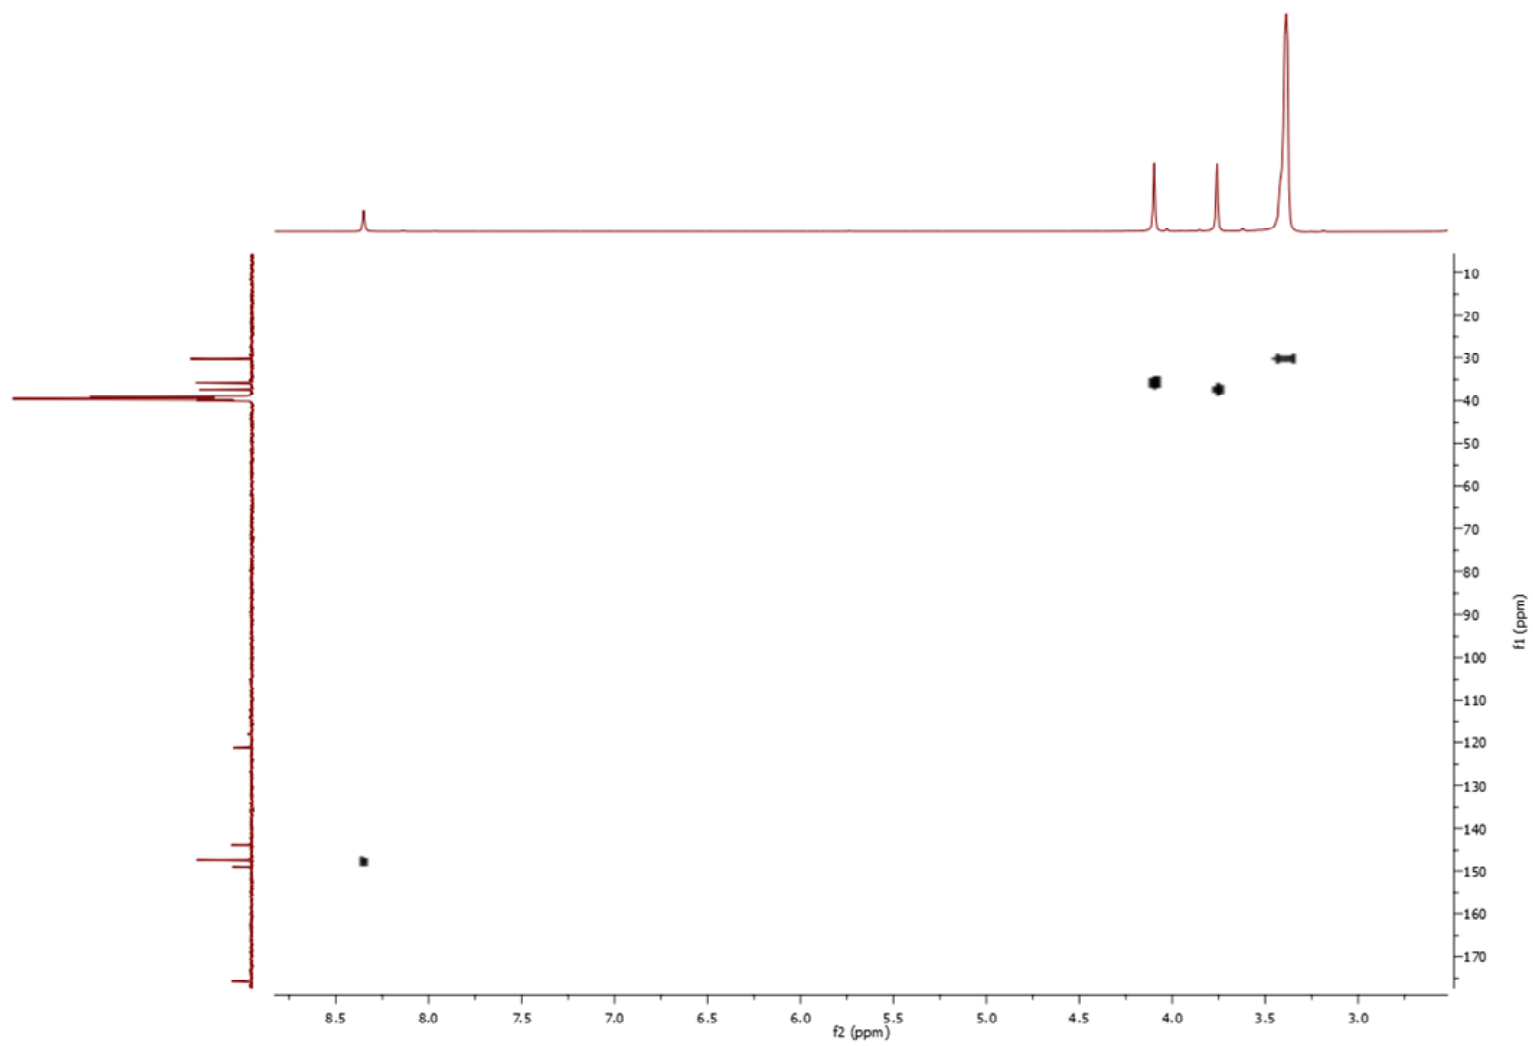

**Figure S4.**  $^{77}\text{Se}$ -NMR spectrum of 6-selenocaffeine, recorded in DMSO- $d_6$ .

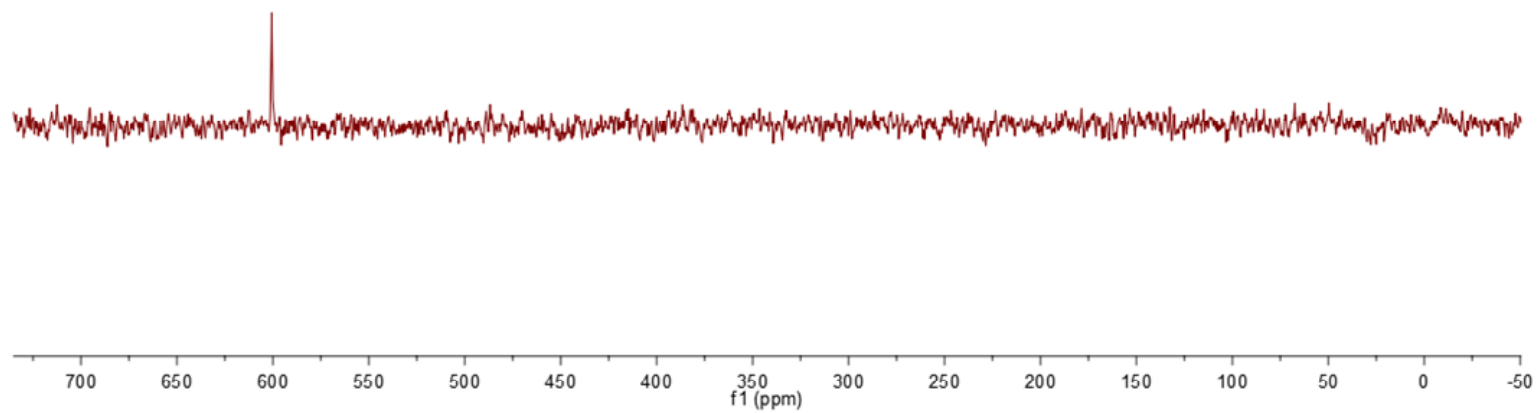

**Figure S5.** Mass spectrum HRMS (EI) of 6-selenocaffeine.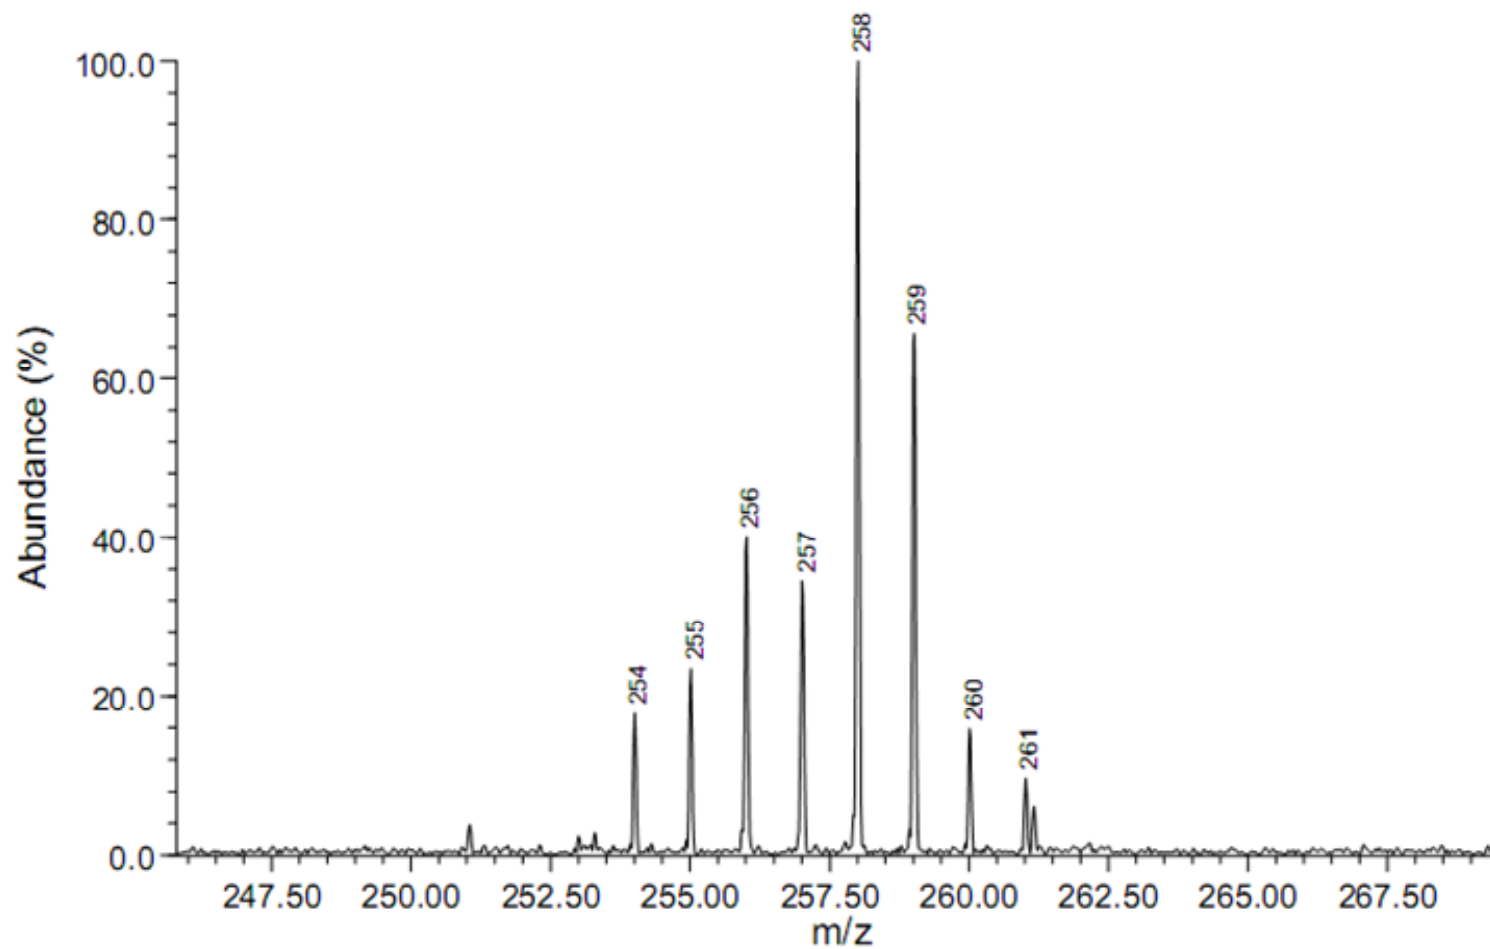

Figure S6. HPLC-DAD chromatogram of 6-selenocaffeine.

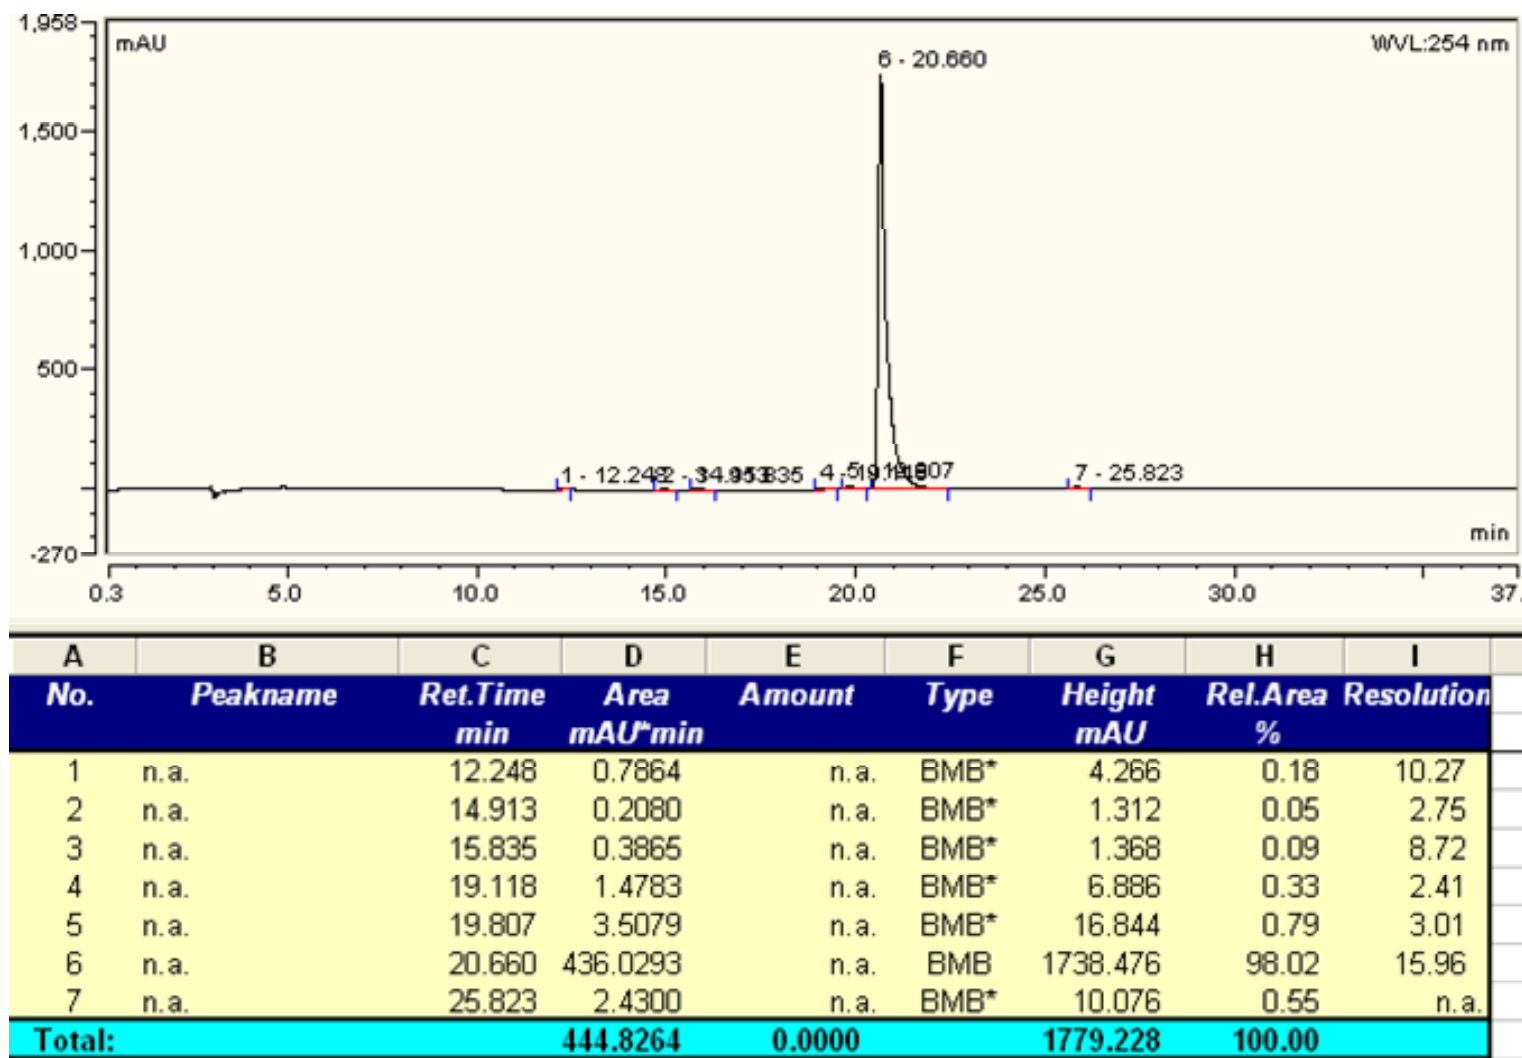

Supplement: molecules-18-05251-s001.pdf [file molecules-18-05251-s001.pdf]
